# Supplementary material for: Ciliary Rab28 and the BBSome negatively regulate extracellular vesicle shedding
Source: eLife. 2020 Feb 26;9:e50580. doi: 10.7554/eLife.50580 (PMC7043889; doi:10.7554/eLife.50580)
Supplement: Figure 1—figure supplement 1—source data 1. [file elife-50580-fig1-figsupp1-data1.xlsx]

## Sheet: RAB-28 phasmid IFT frequency
N2; oqEx304[GFP::RAB-28Q95L] (WT)						arl-6; oqEx304[GFP::RAB-28Q95L]						pdl-1; arl-6; oqEx304[GFP::RAB-28Q95L]
Time (s)	Anterograde particles	Retrograde particles	Particles/s (A)	Particles/s (R)		Time (s)	Anterograde particles	Retrograde particles	Particles/s (A)	Particles/s (R)		Time (s)	Anterograde particles	Retrograde particles	Particles/s (A)	Particles/s (R)
42	4	8	0.0952381	0.190476		27	10	7	0.37037	0.259259		53.4	0	0	0	0
43.8	0	3	0	0.0684932		36	8	7	0.222222	0.194444		66	1	2	0.0151515	0.030303
25.2	5	6	0.198413	0.238095		42	7	7	0.166667	0.166667		78.6	0	2	0	0.0254453
53.4	5	5	0.093633	0.093633		30	5	7	0.166667	0.233333		75.6	1	2	0.0132275	0.026455
48.6	4	3	0.0823045	0.0617284		37.8	9	9	0.238095	0.238095		44.4	1	1	0.0225225	0.0225225
42.6	5	5	0.117371	0.117371		24.6	7	9	0.284553	0.365854		46.2	0	1	0	0.021645
49.8	5	8	0.100402	0.160643		40.2	5	6	0.124378	0.149254		60.6	0	2	0	0.0330033
45.6	6	7	0.131579	0.153509		55.2	11	13	0.199275	0.235507		45.6	1	1	0.0219298	0.0219298
49.8	3	5	0.060241	0.100402		55.2	10	12	0.181159	0.217391		50.4	0	1	0	0.0198413
52.2	7	6	0.1341	0.114943		47.4	10	11	0.21097	0.232068		55.56	0	0	0	0
52.2	3	5	0.0574713	0.0957854		45.6	6	5	0.131579	0.109649		52.8	0	0	0	0
72	7	9	0.0972222	0.125		49.2	10	5	0.203252	0.101626		61.8	1	2	0.0161812	0.0323625
89.4	10	9	0.111857	0.100671		60	10	10	0.166667	0.166667
49.2	4	6	0.0813008	0.121951		48	12	12	0.25	0.25
60.6	6	7	0.0990099	0.115512		52.8	11	12	0.208333	0.227273
81	6	7	0.0740741	0.0864198		46.2	10	12	0.21645	0.25974
81	8	7	0.0987654	0.0864198		30	5	10	0.166667	0.333333
43.2	5	5	0.115741	0.115741		49.8	10	9	0.200803	0.180723
42.6	6	7	0.140845	0.164319		46.8	9	8	0.192308	0.17094
78.6	6	8	0.0763359	0.101781		42.6	11	13	0.258216	0.305164
90	7	7	0.0777778	0.0777778		27.6	8	11	0.289855	0.398551
33.6	2	4	0.0595238	0.119048
