# Supplementary material for: Ciliary Rab28 and the BBSome negatively regulate extracellular vesicle shedding
Source: eLife. 2020 Feb 26;9:e50580. doi: 10.7554/eLife.50580 (PMC7043889; doi:10.7554/eLife.50580)
Supplement: Figure 2—source data 1. [file elife-50580-fig2-data1.xlsx]

## Sheet: RAB-28 EVN IFT frequency
N2; oqEx304[GFP::RAB-28Q95L]	RnB
Time (s)	Antergrade particles	Retrograde particles	Particles/min (A)	Particles/min (R)
30	0	1	0	2
30	0	1	0	2
30	0	1	0	2
30	1	1	2	2
30	0	1	0	2
30	0	2	0	4
30	0	2	0	4
30	0	1	0	2
30	0	1	0	2
30	0	1	0	2
30	1	1	2	2
135.75	0	2	0	0.883978
183.5	0	2	0	0.653951
300	0	1	0	0.2
300	0	1	0	0.2
300	0	1	0	0.2
300	0	1	0	0.2
51.5	0	1	0	1.16505
81.5	0	3	0	2.20859
216	0	1	0	0.277778
216	0	1	0	0.277778
56.4	1	0	1.06383	0
48.6	0	1	0	1.23457
48.6	0	1	0	1.23457
	CEM
Time (s)	Antergrade particles	Retrograde particles	Particles/min (A)	Particles/min (R)
30		0	1	2
30		0	1	2
112.75		0	1	0.532151
35.5		0	1	1.69014
41.4		0	2	2.89855
