# Supplementary material for: Ciliary Rab28 and the BBSome negatively regulate extracellular vesicle shedding
Source: eLife. 2020 Feb 26;9:e50580. doi: 10.7554/eLife.50580 (PMC7043889; doi:10.7554/eLife.50580)
Supplement: Figure 4—figure supplement 2—source data 1. [file elife-50580-fig4-figsupp2-data1.xlsx]

## Sheet: Fig S3B
WT	rab-28(gk1040)
1.1059	6.19378
1.88062	4.72084
1.39684	3.87648
1.60964	2.65784
1.47383	3.94118
1.56591	8.78805
3.08484	5.44766
1.20228	4.43527
1.17497	3.50129
1.78435	5.51458
1.51111	5.32502
2.14461	5.80865
1.7228	3.88657
1.25336	7.21811
1.21845	4.26083
1.19285	2.73306
1.40881	4.21482
1.6717	4.95324
1.69573	3.99362
1.84465	8.07016
1.34337	4.76539
3.2077	5.16777
1.5527	4.94597
1.28039	8.84633
1.01879	5.80364
1.80967	3.48423
4.80143	8.28506

## Sheet: Fig S3C
WT	rab-28(gk1040)
7	1
1	5
4	2
0	2
1	12
4	3
7	2
6	5
6	6
4	5
0	32
22	0
1	0
2	5
15	2
3	36
16	35
13	8
0	2
2	5
3	5
2	16
2	4
0	1
1	0
2	4
