# Supplementary material for: Ciliary Rab28 and the BBSome negatively regulate extracellular vesicle shedding
Source: eLife. 2020 Feb 26;9:e50580. doi: 10.7554/eLife.50580 (PMC7043889; doi:10.7554/eLife.50580)
Supplement: Figure 4—source data 1. [file elife-50580-fig4-data1.xlsx]

## Sheet: Fig 4C
WT	rab-28(tm2636)
757.899	717.281
793.994	760.537
848.664	807.98
910.404	866.139
978.145	940.713
1071.46	1038.77
1184.7	1156.6
1277.22	1277.55
1346.63	1399.95
1426.52	1519.78
1536.35	1656.35
1663.61	1837.11
1753.65	2042.46
1803.63	2268.65
1813.98	2552.1
1825.16	2869.15
1850.32	3180.81
1888.57	3447.31
1940.56	3717.97
1989.14	3988.7
2015.78	4240.53
2053.67	4444.83
2140.5	4585.09
2219.66	4625.79
2252.96	4573.37
2278.63	4426.1
2277.5	4247.24
2282.91	4085.01
2299.55	3944.02
2335.96	3795.19
2404.69	3625.2
2529.4	3443.22
2711.65	3271.67
2950.31	3161.04
3269.27	3094.34
3691.31	3086.25
4157.74	3118.59
4598.87	3172.72
4968.37	3262.32
5274.59	3367.66
5526.49	3461.55
5784.55	3570.95
5976.38	3435.97

## Sheet: Fig 4D
WT	rab-28(tm2636)
1361.28	1891.87
773.122	2178.09
647.355	2890.97
3278.57	1630.13
968.376	1632.82
1349.02	2082.16
2175.16	894.79
2349.78	1711.16
818.223	1012.03
1331.62	1219.97
5942.44	1321.82
1131.25	1083.58
2330.27	1000.79
2137.97	891.599
534.166	5328.75
1098.7	1552.49
1010.61	1115.14
1660.89	8941.28
1535.58	507.987
668.357	604.474
1296.97	980.228
2442.13	3125.65
2131.76	2894.6
2390.21	872.409
3830.85	10723.1
898.663	2757.94
1876.9	4785.8
2636.57	2021.13
6819.11	839.899
1984.9	1931.88
1758.24	880.889
21998.5	2180.82
2026.17	1533.29
849.442	6324.77
1397.88	5254.12
2885.82	10973.2
641.387	1925.68
697.515	3758
418.855	4805.43
778.901	919.281
	3897.81
	1060.98
	1469.83
	1823.4
	3820.66
	2241.75
	2392.33
	861.996
	1866.51
	12523.7

## Sheet: Fig 4E
WT	rab-28(tm2636)
100	6
159	14
28	91
57	52
15	77
15	68
146	95
119	241
64	62
38	31
140	228
143	220
111	183
78	198
4	131
59	175
261	13
95	124
245	172
227	46
19	111
80	228
40	163
54	252
36	90
62	63
101	37
90	133
43	45
44	130
266	261
125	350
117	174
40	30
86	58
188	154
146	63
58	65
153	46
9	29
159	58
5	27
25	45
35	98
100	51
117	139
122	140
	227

## Sheet: Fig 4G
WT	rab-28(tm2636)
305.95	597.033
313.855	630.809
323.727	669.904
338.089	714.351
357.296	764.653
381.161	834.944
402.509	910.132
424.224	1008.35
440.992	1131.93
453.776	1301.37
467.244	1506.42
479.815	1718.17
500.018	1905.4
525.354	2081.61
556.331	2248.07
588.522	2428.94
627.556	2599.91
655.31	2754.09
676.812	2882.46
688.092	2961.33
696.48	2972.61
702.256	2933.39
708.757	2867.93
717.114	2797.76
726.636	2690.48
734.834	2526.4
740.33	2343.23
740.748	2175.32
740.284	2046.7
738.513	1949.08
735.453	1884.24
733.949	1846.73
734.628	1821.04
741.959	1816.56
746.896	1845.17
754.518	1878.7
765.457	1908.65
783.541	1912.67
801.26	1891.1
825.579	1873.14
858.6	1854.99
892.1	1830.37
918.545	1798.17
939.923	1770.2
956.384	1738.73
973.792	1716.96
991.95	1705.32
1008.74	1686.95
1019.35	1664.47
1029.29	1643
1035.42	1609.83
1031.86	1569.39
1027.16	1517.97
1018.49	1478.15
1025.12	1440.31
1032.72	1449.03
1034.13	1399.54
1025.16	1359.84
1011.99	1364.51
982.444	1359.28
944.996	1366.94
919.973	1440.52
892.797	1444.88
881.206	1456.15
876.335	1466.59
894.242	1499.93
892.458	1495.67
892.314	1512.39
896.136	1501.94
903.793	1412.34
914.246	1297.7
932.95	1189.8
935.635	1146.96
931.488	1103.46
912.488	1093.6
908.265	1084.93
886.956	1082.15
884.147	1170.42
866.139	1205.72
840.386	1226.87
837.004	1180.01
807.38	1214.02
769.349	1264.92
735.759	1127.73
713.866	1051.39
709.441	988.092
704.291	930.953
693.936	882.386
686.914	848.215
680.227	824.879
680.229	830.654
676.514	805.739
667.95	779.303
661.211	770.306
653.26	777.507
654.741	782.509
638.496	779.773
626.8	784.272
610.969	756.553
584.999	743.95
635.314	800.66
630.256	798.23
644.199	779.865
653.181	617.37
681.3	600.27
680.37	595.97
640.04	585.83
	583.16
	585.22
	584.79
	585.54
	565.05

## Sheet: Fig 4H
WT	rab-28(tm2636)
609.444	1389.89
686.464	1767.53
769.052	2706.67
586.394	1755.76
818.579	1246.36
612.879	1533.53
685.309	1432.47
592.028	1918.98
934.68	2896.4
750.416	2218.66
858.227	3653.01
785.039	1087.55
674.25	2495.23
776.939	1512.91
990.572	2223.22
574.371	1343.52
717.702	1267.18
705.617	3749.05
639.204	1517.6
975.871	2559.74
600.431	1616.57
570.123	1753.03
599.708	1426.94
751.823	1789.97
660.928	1787.45
736.752	1172.44
854.653	1141.9
684.289	2017.4
715.013	1207.48
863.471	1600.04
887.116	1608.55
592.386	1664.86
603.344
627.986
847.823
572.699
735.27
675.673
722.676
616.649
749.263
704.177
472.51
697.826
664.923
543.804
538.626

## Sheet: Fig 4I 
WT	rab-28(tm2636)
6	2
3	4
2	60
2	7
15	14
4	5
5	11
5	14
4	0
10	3
8	2
5	12
10	6
6	9
0	21
5	13
4	17
2	12
8	7
6	2
12	1
10	0
14	13
7	1
23	38
2	52
19	26
20	5
37	58
64	6
3	10
31	16
56	2
21	5
6	13
13	45
15	18
4	1
3	4
2	8
7	2
5	8
2	1
1	4
2	0
7	7
	18

## Sheet: Fig 4K
WT	bbs-8(nx77)
1.51013	10.6219
1.96429	13.2496
1.58632	19.0243
3.59946	8.63364
1.79879	10.7577
2.68543	13.1332
2.18117	6.03014
1.68081	9.755
1.87279	11.783
1.44684	12.3894
1.25571	20.0328
2.95284	6.41253
2.33237	11.3937
2.00651	12.3395
1.97897	19.588
1.26713	13.1181
2.00381	15.2134
1.10706	8.794
1.73691	10.9674
2.24624	7.07682
1.31404	12.1298
	9.931
	10.5063
	11.1085
	10.2762
	11.062
	14.1116
	13.7976
	12.8882

## Sheet: Fig 4L
WT	arl-6(ok3472)	pdl-1(gk157)
1.1059	6.73242	4.59782
1.88062	8.1326	2.74054
1.39684	5.20703	1.2872
1.60964	4.02857	1.13708
1.47383	4.81343	1.41021
1.56591	3.51314	5.67823
3.08484	4.45942	1.23024
1.20228	6.78297	0.901946
1.17497	3.95942	3.19468
1.78435	5.53435	2.05358
1.51111	8.42546	1.30289
2.14461	6.21345	1.51875
1.7228	5.38305	0.813953
1.25336	4.57682	1.58394
1.21845	2.59753	1.55951
1.19285	4.68479	8.01649
1.40881	4.18343	2.67759
1.6717	5.57561	1.60595
1.69573	3.12112	3.21918
1.84465	4.87198	1.1535
1.34337	4.24805	2.76115
3.2077	4.44657	1.56369
1.5527	5.02842	1.40503
1.28039	2.50656	3.85704
1.01879	2.47639	2.62738
1.80967	1.90317	2.24268
4.80143	5.07553	1.58292

## Sheet: Fig 4M
WT	bbs-8(nx77)
4	9
16	19
24	22
17	8
9	6
70	8
7	53
12	5
10	24
13	27
15	67
6	25
10	2
7	2
21	61
19	16
27	21
30	92
12	12
6	4
13	4
15	14
9	19
3	12
69	8
18	19
12	20
8	46
25	7
6	13
12	4
12	14
2	3
53	11

## Sheet: Fig 4N
WT	arl-6(ok3472)	pdl-1(gk157)
7	2	5
1	1	5
4	2	10
37	2	12
5	9	7
0	37	4
9	3	12
7	3	0
0	0	7
1	4	4
4	4	0
7	4	10
6	24	1
6	1	7
4	26	10
0	7	2
9	0	0
5	3	1
22	2	0
1	7	0
2	9	2
15	8	9
3	15	3
16	8	1
13	21	4
0	10	5
2	34	5
3	3	26
2	0	2
2	0	28
14	23	13
