# Supplementary material for: Ciliary Rab28 and the BBSome negatively regulate extracellular vesicle shedding
Source: eLife. 2020 Feb 26;9:e50580. doi: 10.7554/eLife.50580 (PMC7043889; doi:10.7554/eLife.50580)
Supplement: Figure 5—figure supplement 1—source data 1. [file elife-50580-fig5-figsupp1-data1.xlsx]

## Sheet: Fig S4B
WT	rab-28(tm2636)
14	37
7	48
11	26
11	81
	128
	77
	69

## Sheet: Fig S4C
WT	rab-28(tm2636)
1	12
0	25
33	44
8	143
0	16
26	40
11	3
	81
	41

## Sheet: FIg S4F
WT	rab-28(tm2636)
6	22
2	5
9	22
14	12
	7
