# Supplementary material for: Ciliary Rab28 and the BBSome negatively regulate extracellular vesicle shedding
Source: eLife. 2020 Feb 26;9:e50580. doi: 10.7554/eLife.50580 (PMC7043889; doi:10.7554/eLife.50580)
Supplement: Supplementary file 2. [file elife-50580-supp2.xlsx]

## Sheet: Sheet1
Primers used in this study
Primer name	Sequence (5'-3')	Purpose
rab-28(tm2636)_fwd	CATATGAGGCGTCTGATTGCTGA	Genotyping
rab-28(tm2636)_rev	GACGTGTGGTTTCAGTTGAAG	Genotyping
rab-28(gk1040)_ fwd	GAATCACGCTTCCACACGAAATGCAG	Genotyping
rab-28(gk1040)_mut_rev	GGATAAAATTTTTGACGCCGGGATCG	Genotyping
rab-28(gk1040)_wt_rev	CCGGTGAAACTAGTATTGATGGG	Genotyping
pdl-1(gk157)_fwd	AATTTGTAGGTTATCTAAACGATAC	Genotyping
pdl-1(gk157)_mut_rev	CTTAGAAATCTAGTACTTTTGCAC	Genotyping
pdl-1(gk157)_wt_rev	GAGCTCTACTCTCTGAAGAAAG	Genotyping
arl-6(ok3472)_fwd	TTGAACTCTTGCCGAAAAGGTC	Genotyping
arl-6(ok3472)_rev	CTTTGAGCAACTCCATTCGAAG	Genotyping
bbs-8(nx77)_fwd	TTGTGTAGGCGAGACGAAGC	Genotyping
bbs-8(nx77)_mut_rev	ATTTCAGGGCCCAATCCACC	Genotyping
bbs-8(nx77)_wt_rev	ACAAATACGCAGCCGATCCA	Genotyping
bbs-5(gk507)_fwd	AGAAGTCATTCTGAGCGTC	Genotyping
bbs-5(gk507)_mut_rev	CTACCGTACACCTGGAC	Genotyping
bbs-5(gk507)_wt_rev	GATTAGGCGGAGAAGTCTTG	Genotyping
arl-3(tm1703)_fwd	ACATACGGGAGCTAGAGAGT	Genotyping
arl-3(tm1703)_rev	GTGAGCTGATGAGTGTCTGA	Genotyping
rab-28 exon1F	ATGACAACAATGGGAGAAGAC	RT-PCR
rab-28 exon 7R	TTAAGTAATGGAGCATACAGATG	RT-PCR
rab-28seqF	AGATGGAGCAAGTGGAAAGAC	Sequencing
