# Supplementary material for: Ciliary Rab28 and the BBSome negatively regulate extracellular vesicle shedding
Source: eLife. 2020 Feb 26;9:e50580. doi: 10.7554/eLife.50580 (PMC7043889; doi:10.7554/eLife.50580)
Supplement: Supplementary file 3. [file elife-50580-supp3.xlsx]

## Sheet: Sheet1
Figure	Mean for WT anterograde	Mean for WT retrograde	Mean for arl-6(ok3472) anterograde	Mean for arl-6(ok3472) retrograde	Mean for pdl-1; arl-6 anterograde	Mean for pdl-1; arl-6 retrograde	Standard error for WT anterograde	Standard error for WT retrograde	Standard error for arl-6(ok3472) anterograde	Standard error for arl-6(ok3472) retrograde	Standard error for pdl-1; arl-6 anterograde	Standard error for pdl-1; arl-6 retrograde
S1B	0.0956	0.1186	0.2118	0.2284	0.00989	0.02595	0.008227	0.008848	0.01243	0.01678	0.003279	0.001642
Figure	Mean for RnB anterograde	Mean for RnB retrograde	Mean for CEM retrograde	Standard error for RnB anterograde	Standard error for RnB retrograde	Standard error for CEM retrograde
3C	1.688	1.51	1.824	0.3121	0.2282	0.381
Figure	Mean for WT	Mean for rab-28(tm2636)	Standard error for WT	Standard error for rab-28(tm2636)
4D	2322	2819	546.7	389.9
4E	94.13	114.5	9.898	11.65
4H	702.8	1846	17.26	118.6
4I	10.78	12.4	1.95	2.173
S4B	10.75	66.57	1.436	12.87
S4C	11.29	45	5.022	14.45
S4F	7.75	13.6	2.529	3.614
Figure	Mean for WT	Mean for bbs-8(nx77)	Standard error for WT	Standard error for bbs-8(nx77)
4K	1.93	12.02	0.1322	0.8575
4M	17.41	19.91	2.806	3.549
Figure	Mean for WT	Mean for arl-6(ok3472)	Mean for pdl-1(gk157)	Standard error for WT	Standard error for arl-6(ok3472)	Standard error for pdl-1(gk157)
4L	1.739	4.759	2.36	0.1542	0.3074	0.3132
4N	6.677	8.774	6.29	1.404	1.848	1.223
Figure	Mean for WT	Mean for rab-28(gk1040)	Standard error for WT	Standard error for rab-28(gk1040)
S3B	1.739	5.216	0.1542	0.3328
S3C	4.769	7.615	1.111	2.057
